# Supplementary material
Source: MDPI journal article supplement (https://www.mdpi.com/2073-4441/16/19/2846)
Supplement: s1 [file water-3121973-supplementary.pdf › water-3121973-supplementary.pdf]

**Table S1.** Habitat and occurrence patterns of *Aurelia* species across various regions.

| Area                  | Species                 | Location                     | Water Temp.<br>(°C) | Ephyrae          |                  | Medusae    |                                     | Ref.                       |
|-----------------------|-------------------------|------------------------------|---------------------|------------------|------------------|------------|-------------------------------------|----------------------------|
|                       |                         |                              |                     | Occu.<br>(month) | Occu.<br>(month) | BD<br>(cm) | Growth rate<br>(day <sup>-1</sup> ) |                            |
| East Asia             | <i>Aurelia coerulea</i> | Geoje Bay, Korea             | 8.8–28              | 2–4              | WY               | 6–30       | -0.007–0.07                         | This study                 |
|                       |                         | Maizuru Bay, Japan           | 11–28               | 12–5             | WY               | nd         | nd                                  | Suzuki et al. [77]         |
|                       |                         | Tokyo Bay, Japan             | 10–26               | 3–5              | WY               | 30(max)    | 0.07                                | Omori et al. [60]          |
|                       | <i>A. aurita</i>        | Tapong Bay, SW Taiwan        | 17–33               | 12–4             | WY               | 29.7(max)  | 0.8**                               | Lo and Chen [34]           |
|                       |                         | Inland Sea of Japan          | 9.3–29.6            | 1–2              | 4–11             | 16.4–27.3  | 0.07                                | Uye and Shimauchi [67]     |
|                       |                         | Jiaozhou Bay, China          | 4–27.4              | 5–6              | 7–9              | 16.8(max)  | nd                                  | Wang and Sun [45]          |
|                       | <i>A. aurita</i> sp.1   | Lake Nakaumi, Japan          | 3.2–30.7            | 12–4             | 6–11             | 10.4–17.1  | nd                                  | Han et al. [33]            |
|                       |                         | Mikawa Bay, Japan            | 8.3–26.5            | nd               | 3–8              | 12–32.6    | 0.06–0.08                           | Aoki et al. [78]           |
| Mediterranean         | <i>A. aurita</i> sp.    | Thau lagoon                  | 4.6–26.7            | 11–5             | 3–6              | 22.38(max) | 0.57–2.53**                         | Marques et al. [79]        |
|                       |                         | Berre lagoon, France         | 4.5–25.6            | 11–4             | 1–5              | 17(max)    | 1.57–2.22**                         | Marques et al. [79]        |
|                       |                         | Mijet Island (veliko Jezero) | 9.7–29.4            | nd               | WY               | 55(max)    | nd                                  | Benovic et al. [80]        |
|                       |                         | Bages-Sigean                 | 11.2–27.6           | nd               | 5–8              | 31.9(max)  | 2.66**                              | Marques et al. [79]        |
| Baltic sea            | <i>A. aurita</i>        | Kiel Bight, W. Baltic sea    | nd                  | 11–8             | 4–11             | 44(max)    | 0.18                                | Möller [70]                |
| Northeastern Atlantic | <i>A. aurita</i>        | Gullmarfjord, Sweden         | 1–14                | 10–5             | 4–6              | nd         | 0.23                                | Hernroth and Grondahl [81] |
|                       |                         | Horsea Lake, U.K             | 5.5–23              | 12–6             | WY               | 10.5(max)  | -0.03–0.07                          | Lucas [22]                 |
|                       |                         | Southampton Water, U.K       | 4–21                | 2–5              | 4–6              | 2–15       | 0.02–4.8                            | Lucas and Williams [82]    |
|                       |                         | Vagsbopollen, Norway         | 8–15.8              | nd               | nd               | 11.8(max)  | 0.04–0.1                            | Ishii and Båmstedt [23]    |
|                       |                         | Kertinge Nor, Denmark        | 2–22                | 2–3              | 4–8              | 22.3(max)  | -0.09–0.17                          | Møller and Riisgård [63]   |
| Black sea             | <i>A. aurita</i>        | Black sea                    | 8–26                | 3–5              | WY               | 1.2–43     | nd                                  | Mutlu [68]                 |
| Northwestern Pacific  | <i>A. aurita</i> sp.4   | Jellyfish Lake, Palau        | 30–33               | WY               | WY               | 29(max)    | nd                                  | Hamner and Jenssen [64]    |

\*Abbreviations: Water Temp.: water temperature, Occu.: occurrence, BD: Bell diameter, nd: no data, WY: whole year

\*\*Growth rate unite: mm day<sup>-1</sup>

**Table S2.** Total abundance (ind. m<sup>-3</sup>) of zooplankton species in the Geoje Bay.

| Species                         | Month |      |      |       |       |      |      |      |      |      |      |      |
|---------------------------------|-------|------|------|-------|-------|------|------|------|------|------|------|------|
|                                 | Nov.  | Dec. | Jan. | Feb.  | Mar.  | Apr. | May  | Jun. | Jul. | Aug. | Sep. | Oct. |
| <b>Calanoida</b>                |       |      |      |       |       |      |      |      |      |      |      |      |
| <i>Acartia erythraea</i>        | 0     | 0    | 0    | 0     | 0     | 0    | 0    | 0    | 0    | 0    | 0    | 38   |
| <i>Acartia ohtsukai</i>         | 0     | 0    | 0    | 0     | 0     | 0    | 0    | 0    | 0    | 0    | 73   | 160  |
| <i>Acartia</i> spp.             | 8131  | 7961 | 6826 | 10176 | 10381 | 1915 | 1221 | 457  | 5558 | 8984 | 491  | 1558 |
| <i>Calanus sinicus</i>          | 0     | 0    | 0    | 39    | 0     | 0    | 0    | 0    | 0    | 0    | 0    | 1    |
| <i>Centropages abdominalis</i>  | 0     | 0    | 8    | 23    | 0     | 0    | 0    | 0    | 0    | 0    | 0    | 0    |
| <i>Eurytemora pacifica</i>      | 167   | 263  | 3348 | 9572  | 8863  | 12   | 0    | 0    | 0    | 0    | 0    | 0    |
| <i>Paracalanus parvus</i> s.l.  | 455   | 166  | 98   | 367   | 555   | 37   | 62   | 3    | 47   | 617  | 12   | 120  |
| <i>Pseudodiaptomus inopinus</i> | 0     | 0    | 0    | 0     | 0     | 0    | 0    | 0    | 0    | 0    | 15   | 0    |
| <i>Labidocera euchaeta</i>      | 0     | 0    | 0    | 0     | 0     | 2    | 0    | 0    | 0    | 0    | 0    | 0    |
| <i>Labidocera</i> copepodite    | 0     | 0    | 0    | 0     | 0     | 0    | 0    | 0    | 0    | 0    | 6    | 0    |
| <b>Cyclopoida</b>               |       |      |      |       |       |      |      |      |      |      |      |      |
| <i>Corycaeus affinis</i>        | 0     | 6    | 0    | 0     | 0     | 13   | 0    | 0    | 0    | 0    | 0    | 0    |
| <i>Oithona davisae</i>          | 0     | 0    | 0    | 0     | 0     | 0    | 0    | 0    | 129  | 61   | 12   | 3    |
| <i>Oithona similis</i>          | 44    | 15   | 12   | 0     | 0     | 0    | 15   | 0    | 0    | 0    | 0    | 0    |
| <i>Oncaea</i> sp.               | 2     | 0    | 0    | 0     | 0     | 0    | 0    | 0    | 0    | 0    | 0    | 0    |
| <b>Harpacticoida</b>            |       |      |      |       |       |      |      |      |      |      |      |      |
| Unidentified Harpacticoids      | 0     | 0    | 0    | 0     | 0     | 9    | 0    | 0    | 0    | 0    | 0    | 0    |
| <b>Cladoceran</b>               |       |      |      |       |       |      |      |      |      |      |      |      |
| <i>Podon leukartii</i>          | 0     | 0    | 0    | 0     | 0     | 6    | 15   | 107  | 607  | 263  | 14   | 0    |
| <i>Pseudevadne tergestina</i>   | 0     | 0    | 0    | 0     | 0     | 0    | 0    | 0    | 191  | 12   | 0    | 0    |

**Chaetognatha**

|                             |   |    |   |   |   |   |   |   |   |   |   |   |
|-----------------------------|---|----|---|---|---|---|---|---|---|---|---|---|
| <i>Sagitta</i> juvenile     | 4 | 20 | 0 | 0 | 0 | 0 | 7 | 0 | 0 | 0 | 0 | 5 |
| <i>Sagitta</i> <i>nagae</i> | 0 | 0  | 0 | 0 | 0 | 0 | 0 | 0 | 0 | 0 | 4 | 0 |

**Appendicularia**

|                        |   |   |    |    |   |   |    |    |    |    |   |   |
|------------------------|---|---|----|----|---|---|----|----|----|----|---|---|
| <i>Oikopleura</i> spp. | 0 | 0 | 42 | 71 | 0 | 2 | 54 | 17 | 81 | 98 | 0 | 0 |
|------------------------|---|---|----|----|---|---|----|----|----|----|---|---|

**Larvae**

|                   |    |    |    |    |    |    |     |     |     |      |     |     |
|-------------------|----|----|----|----|----|----|-----|-----|-----|------|-----|-----|
| Calytopis larvae  | 0  | 0  | 0  | 0  | 0  | 0  | 0   | 0   | 33  | 0    | 2   | 0   |
| Cirriped larvae   | 16 | 0  | 0  | 0  | 0  | 6  | 682 | 456 | 774 | 2044 | 208 | 816 |
| Lucifer larvae    | 0  | 0  | 0  | 0  | 0  | 0  | 0   | 1   | 0   | 0    | 0   | 0   |
| Megalopa larvae   | 0  | 0  | 0  | 0  | 0  | 0  | 0   | 1   | 0   | 0    | 4   | 0   |
| Mollusks larvae   | 0  | 0  | 0  | 0  | 0  | 1  | 15  | 0   | 99  | 165  | 13  | 0   |
| Mysid larvae      | 0  | 4  | 44 | 27 | 52 | 3  | 22  | 0   | 0   | 22   | 0   | 8   |
| Polychaeta larvae | 0  | 0  | 0  | 0  | 0  | 51 | 0   | 6   | 0   | 11   | 0   | 0   |
| Zoea larvae       | 0  | 10 | 0  | 0  | 0  | 0  | 54  | 4   | 16  | 0    | 0   | 0   |

---
